# Supplementary material
Source: publisher site journal article supplement (https://www.dovepress.com/article/230149)
Supplement: Supplementary file 1 [file get_supplementary_file.php]

Supplementary Table 1 Characteristics of melanoma patients diagnosed between 2003 and 2015

| Characteristics | | Number of cases | Percentage |
| --- | --- | --- | --- |
| Gender | Male | 14040 | 48.9 |
| Female | 14676 | 51.1 |
| Year of diagnosis | ≤ 2005 | 4977 | 17.3 |
| 2006-2010 | 10296 | 35.9 |
| > 2011 | 13443 | 46.8 |
| Age at diagnosis  (years old) | ≤ 50 | 7769 | 27.1 |
| 51-60 | 5221 | 18.2 |
| 61-70 | 6663 | 23.2 |
| 71-80 | 5367 | 18.7 |
| 81-90 | 3119 | 10.9 |
| >90 | 577 | 2.0 |
| Tumor size | T0 | 23 | 0.1 |
| T1 | 14118 | 49.2 |
| T2 | 4938 | 17.2 |
| T3 | 3149 | 11.0 |
| T4 | 2600 | 9.1 |
| TX | 410 | 1.4 |
| Missing | 3478 | 12.1 |
| Regional metastases | N0 | 16873 | 58.8 |
| NX | 5962 | 20.8 |
| N+ | 638 | 2.2 |
| Missing | 5243 | 18.3 |
| Distant metastases | M0 | 16018 | 55.8 |
| MX | 6605 | 23.0 |
| M+ | 220 | 0.8 |
| Missing | 5873 | 20.5 |
| Histology | Superficial spreading melanoma | 16496 | 57.5 |
| Nodular melanoma | 4461 | 15.5 |
| Lentigo maligna melanoma | 1576 | 5.5 |
| Others | 6183 | 21.5 |
